# Supplementary material for: C-Phycocyanin inhibits hepatic gluconeogenesis and increases glycogen synthesis via activating Akt and AMPK in insulin resistance hepatocytes
Source: Royal Society of Chemistry journal article supplement (doi:10.1039/c8fo00257f), 2018-01-01
Supplement: c8fo00257f1.pdf [file c8fo00257f1.pdf]

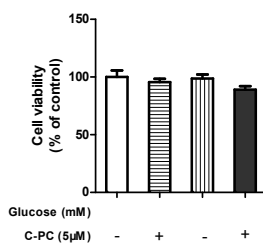

Fig. S1 Effect of C-PC and glucose on the viability of HepG2 cells. HepG2 cells were incubated for 24 h without or with 5 mM C-PC in the absence or presence of high glucose.
